# Supplementary material for: Urinary adiponectin and albuminuria in non-diabetic hypertensive patients: an analysis of the ESPECIAL trial
Source: PubMed Central journal article supplement (PMC4522110; doi:10.1186/s12882-015-0124-3), 2015-08-01
Supplement: 12882_2015_124_MOESM1_ESM.pdf [file 12882_2015_124_MOESM1_ESM.pdf]

Additional file 1. Urinary adiponectin in predicting 8-week macroalbuminuria

| 8-week outcome   | Adiponectin group       | Model 1          |          | Model 2          |          | Model 3           |          |
|------------------|-------------------------|------------------|----------|------------------|----------|-------------------|----------|
|                  |                         | OR (95% CI)      | <i>P</i> | OR (95% CI)      | <i>P</i> | OR (95% CI)       | <i>P</i> |
| Macroalbuminuria | 1 <sup>st</sup> tertile | 1 (Reference)    |          | 1 (Reference)    |          | 1 (Reference)     |          |
|                  | 2 <sup>nd</sup> tertile | 2.3 (0.96–5.44)  | 0.063    | 2.3 (0.83–6.29)  | 0.109    | 2.8 (0.91–8.73)   | 0.072    |
|                  | 3 <sup>rd</sup> tertile | 6.7 (2.62–17.01) | < 0.001  | 6.0 (1.91–18.57) | 0.002    | 11.3 (2.92–43.95) | < 0.001  |

Model 1: unadjusted for any covariate.

Model 2: adjusted for age, sex, dyslipidemia, smoking, exercise, diet education, statin, hemoglobin, and estimated glomerular filtration rate.

Model 3: adjusted for all the covariates.

OR, odds ratio; CI, confidence interval.
